# Supplementary material for: Discovery of Biomarkers Related to Interstitial Fibrosis and Tubular Atrophy among Kidney Transplant Recipients by mRNA-Sequencing
Source: MDPI journal article supplement (doi:10.3390/jpm13081242), 2023-08-10
Supplement: s1 [file s1]

## *Supplementary Material*

**Table S1.** qPCR probe information.

|   | Gene ID        | Assay ID      |
|---|----------------|---------------|
| 1 | <i>ADAMTS2</i> | Hs01029111_m1 |
| 2 | <i>CXCR2</i>   | Hs01891184_s1 |
| 3 | <i>IL1R2</i>   | Hs00174759_m1 |
| 4 | <i>MMP9</i>    | Hs00957562_m1 |
| 5 | <i>CHI3L1</i>  | Hs01072228_m1 |
| 6 | <i>LRG1</i>    | Hs00364835_m1 |
| 7 | <i>GAPDH</i>   | Hs99999905_m1 |

**Table S2.** Clinicopathological features for IF/TA patients and controls at one-year protocol biopsy after kidney transplantation

| Sample | Banff scores                                                             | Diagnosis                      | Recipient age | Sex | BMI   | Dialysis | Original disease | Donor type | Donor age | POD  | eGFR biopsy | eGFR sampling |
|--------|--------------------------------------------------------------------------|--------------------------------|---------------|-----|-------|----------|------------------|------------|-----------|------|-------------|---------------|
| I1     | t1, v0, i2, g0, ti2, i-IFTA1 / ci1, ct2, cg0, mm0, cv0, ah0, aah0 / ptc0 | IF/TA grade 2, Borderline TCMR | 47            | M   | 25.29 | ND       | DM               | LU         | 45        | 780  | 62.8        | 64.4          |
| I2     | t1, v0, i1, g0, ti1, i-IFTA1 / ci1, ct1, cg0, mm0, cv0, ah0, aah0 / ptc0 | IF/TA grade 1, Borderline TCMR | 27            | M   | 20.74 | HD       | GN               | LR         | 53        | 610  | 64.3        | 84.4          |
| I3     | t1, v0, i0, g0, ti0, i-IFTA1 / ci0, ct1, cg0, mm0, cv0, ah0, aah0 / ptc0 | IF/TA grade 1, Borderline TCMR | 53            | F   | 17.80 | HD       | GN               | D          | 66        | 986  | 53.9        | 63.9          |
| I4     | t0, v0, i1, g0 / ci0, ct1, cg0, mm0, cv0, ah0 / ptc0                     | IF/TA grade 1                  | 44            | F   | 19.97 | HD       | GN               | D          | 49        | 1259 | 59.1        | 73.7          |
| I5     | t1, v0, i1, g0 / ci1, ct1, cg0, mm0, cv2, ah0 / ptc0                     | IF/TA grade 1, Borderline TCMR | 49            | M   | 22.60 | HD       | others           | D          | 45        | 1637 | 70.1        | 68.6          |
| I6     | t2, v0, i1, g0, ti1, i-IFTA2 / ci1, ct1, cg0, mm0, cv2, ah0, aah0 / ptc0 | IF/TA grade 1, Borderline TCMR | 50            | M   | 23.72 | HD       | UK               | LR         | 52        | 806  | 55.7        | 51.9          |
| I7     | t1, v0, i1, g0, ti1, i-IFTA1 / ci0, ct1, cg0, mm0, cv2, ah0, aah0 / ptc0 | IF/TA grade 1, Borderline TCMR | 33            | M   | 25.91 | ND       | others           | LR         | 65        | 638  | 48.3        | 50.5          |
| I8     | t0, v0, i1, g0, ti1, i-IFTA1 / ci1, ct0, cg0, mm0, cv1, ah0, aah0 / ptc0 | IF/TA grade 1                  | 67            | M   | 20.44 | HD       | UK               | D          | 46        | 814  | 59.0        | 66.4          |
| I9     | t0, v0, i0, g0, ti0, i-IFTA0 / ci0, ct1, cg0, mm0, cv0, ah0, aah0 / ptc0 | IF/TA grade 1                  | 64            | F   | 29.12 | ND       | UK               | LR         | 42        | 593  | 80.0        | 73.0          |
| I10    | t1, v0, i0, g0, ti1, i-IFTA2 / ci2, ct2, cg0, mm0, cv2, ah0, aah0 / ptc0 | IF/TA grade 1, Borderline TCMR | 61            | F   | 21.29 | HD       | UK               | D          | 71        | 745  | 40.8        | 42.5          |
| I11    | t1, v0, i2, g1, ti2, i-IFTA1 / ci1, ct1, cg0, mm0, cv0, ah0, aah0 / ptc0 | IF/TA grade 1, Borderline TCMR | 55            | M   | 22.30 | HD       | DM               | LU         | 50        | 636  | 59.2        | 56.9          |
| I12    | t1, v0, i1, g0, ti2, i-IFTA1 / ci1, ct2, cg0, mm0, cv1, ah0, aah0 / ptc1 | IF/TA grade 2, Borderline TCMR | 34            | F   | 18.18 | PD       | PKD              | D          | 34        | 1174 | 50.5        | 48.2          |
| I13    | t2, v0, i1, g0 / ci2, ct2, cg0, mm0, cv2, ah0 / ptc0                     | IF/TA grade 2, Borderline TCMR | 61            | M   | 23.59 | ND       | others           | LR         | 48        | 1279 | 75.4        | 84.0          |
| I14    | t1, v0, i1, g0 / ci1, ct1, cg0, mm0, cv0, ah0 / ptc0                     | IF/TA grade 1, Borderline TCMR | 64            | F   | 20.67 | HD       | GN               | LR         | 55        | 1056 | 79.8        | 84.9          |
| I15    | t1, v0, i0, g0, ti0, i-IFTA0 / ci0, ct1, cg0, mm0, cv0, ah0, aah0 / ptc0 | IF/TA grade 1, Borderline TCMR | 44            | M   | 27.80 | HD       | GN               | LU         | 41        | 477  | 40.7        | 50.6          |
| I16    | t0, v0, i0, g0, ti0, i-IFTA0 / ci0, ct1, cg0, mm0, cv0, ah0, aah0 / ptc0 | IF/TA grade 1                  | 56            | M   | 24.45 | PD       | DM               | LU         | 52        | 684  | 62.4        | 73.4          |
| I17    | t0, v0, i0, g0, ti0, i-IFTA1 / ci0, ct1, cg0, mm0, cv0, ah0, aah0 / ptc0 | IF/TA grade 1                  | 36            | M   | 30.07 | HD       | UK               | LR         | 62        | 1035 | 52.9        | 56.4          |
| I18    | t1, v0, i1, g0, ti1, i-IFTA1 / ci0, ct1, cg0, mm0, cv1, ah0, aah0 / ptc0 | IF/TA grade 1, Borderline TCMR | 51            | M   | 24.35 | HD       | DM               | LU         | 43        | 708  | 66.5        | 51.7          |

|     |                                                                           |                                |    |   |       |    |     |    |    |      |       |      |
|-----|---------------------------------------------------------------------------|--------------------------------|----|---|-------|----|-----|----|----|------|-------|------|
| I19 | t1, v0, i1, g0, ti1, i-IFTA0 / ci1, ct1, cg0, mm0, cv1, ah0, aah0 / ptc0  | IF/TA grade 1, Borderline TCMR | 58 | F | 20.04 | HD | UK  | D  | NA | 789  | 40.8  | 39.3 |
| I20 | t1, v0, i0, g0, ti1, i-IFTA1 / ci1, ct1, cg0, mm0, cv0, ah0, aah0 / ptc0  | IF/TA grade 1, Borderline TCMR | 39 | F | 31.79 | ND | PKD | LR | 41 | 435  | 60.0  | 57.8 |
| I21 | t0, v0, i0, g0, ti0, i-IFTA0 / ci0, ct1, cg0, mm0, cv2, ah0, aah0 / ptc0  | IF/TA grade 1                  | 65 | M | 24.55 | HD | PKD | D  | 69 | 460  | 63.6  | 71.5 |
| I22 | t0, v0, i0, g0, ti1, i-IFTA1 / ci0, ct1, cg0, mm0, cv2, ah0, aah0 / ptc0  | IF/TA grade 1                  | 60 | M | 23.05 | ND | GN  | LR | 57 | 887  | 58.7  | 65.1 |
| I23 | t1, v0, i1, g0, ti1, i-IFTA2 / ci0, ct1, cg0, mm0, cv0, ah0, aah0 / ptc0  | IF/TA grade 1, Borderline TCMR | 58 | F | 22.96 | HD | DM  | D  | 34 | 911  | 68.3  | 54.7 |
| I24 | t1, v0, i1, g0, ti2, i-IFTA2 / ci1, ct1, cg0, mm0, cv1, ah0, aah0 / ptc1  | IF/TA grade 1, Borderline TCMR | 43 | F | 35.32 | HD | DM  | D  | 35 | 576  | 68.0  | 59.3 |
| I25 | t0, v0, i1, g0 / ci1, ct1, cg0, mm0, cv0, ah0 / ptc0                      | IF/TA grade 1                  | 36 | M | 23.82 | HD | HTN | LR | 33 | 1833 | 62.9  | 57.7 |
| I26 | t0, v0, i0, g0, ti0, i-IFTA0 / ci1, ct1, cg0, mm0, cv1, ah0, aah0 / ptc0  | IF/TA grade 1                  | 58 | M | 27.52 | HD | DM  | D  | 30 | 1271 | 59.5  | 68.8 |
| I27 | t0, v0, i0, g0, ti0, i-IFTA0 / ci1, ct1, cg0, mm0, cv1, ah1, aah0 / ptc0  | IF/TA grade 1                  | 41 | F | 18.14 | ND | GN  | LR | 40 | 625  | 53.3  | 52.0 |
| I28 | t1, v0, i1, g1, ti1, i-IFTA2 / ci1, ct1, cg0, mm0, cv0, ah0, aah0 / ptc0  | IF/TA grade 1, Borderline TCMR | 52 | F | 25.37 | HD | GN  | D  | 50 | 783  | 63.1  | 78.1 |
| I29 | t0, v0, i0, g0, ti1, i-IFTA1 / ci0, ct1, cg0, mm0, cv0, ah0, aah0 / ptc0  | IF/TA grade 1                  | 34 | M | 16.22 | HD | GN  | D  | NA | 953  | 79.4  | 70.1 |
| I30 | t0, v0, i1, g0 / ci1, ct1, cg0, mm0, cv1, ah0 / ptc0                      | IF/TA grade 1                  | 50 | F | 22.89 | PD | GN  | D  | 74 | 1686 | 35.4  | 26.2 |
| I31 | t0, v0, i0, g0 / ci0, ct0, cg0, mm0, cv0, ah0 / ptc0                      | IF/TA grade 1, Borderline TCMR | 56 | F | 21.71 | HD | HTN | D  | NA | 1411 | 57.6  | 59.3 |
| I32 | t1, v0, i2, g0, ti2, i-IFTA2 / ci1, ct1, cg0, mm0, cv1, ah0, aah0 / ptc2  | IF/TA grade 1, Borderline TCMR | 50 | F | 19.49 | HD | PKD | LR | 54 | 1091 | 65.1  | 66.3 |
| I33 | t1, v0, i1, g0 / ci0, ct1, cg0, mm0, cv0, ah0 / ptc0                      | IF/TA grade 1, Borderline TCMR | 40 | F | 18.18 | HD | GN  | D  | 37 | 1508 | 78.9  | 75.7 |
| I34 | t1, v0, i0, g0, ti0, i-IFTA0 / ci0, ct1, cg0, mm0, cv0, ah0, aah0 / ptc0  | IF/TA grade 1, Borderline TCMR | 46 | M | 23.36 | HD | DM  | D  | 25 | 636  | 103.6 | 97.5 |
| I35 | t1, v0, i1, g0, ti1, i-IFTA2 / ci0, ct1, cg0, mm0, cv0, ah0, aah0 / ptc0  | IF/TA grade 1, Borderline TCMR | 64 | M | 26.98 | PD | UK  | LU | 61 | 531  | 70.9  | 56.4 |
| I36 | t0, v0, i0, g0, ti0, i-IFTA0 / ci0, ct1, cg0, mm0, cv1, ah0, aah0 / ptc0  | IF/TA grade 1                  | 46 | F | 26.22 | ND | PKD | LU | 46 | 642  | 64.6  | 59.2 |
| I37 | t1, v0, i1, g0 / ci1, ct1, cg0, mm0, cv0, ah0 / ptc0                      | IF/TA grade 1, Borderline TCMR | 41 | F | 21.15 | HD | UK  | LR | 62 | 1786 | 47.7  | 47.0 |
| I38 | t1, v0, i0, g0, ti1, i-IFTA1 / ci1, ct1, cg1a, mm0, cv1, ah0, aah0 / ptc0 | IF/TA grade 1, Borderline TCMR | 65 | M | 23.49 | HD | PKD | D  | 70 | 630  | 55.2  | 58.7 |

|     |                                                                          |                                |    |   |       |    |        |    |    |      |      |      |
|-----|--------------------------------------------------------------------------|--------------------------------|----|---|-------|----|--------|----|----|------|------|------|
| I39 | t1, v0, i1, g1 / ci1, ct1, cg0, mm0, cv1, ah0 / ptc0                     | IF/TA grade 1, Borderline TCMR | 58 | F | 20.40 | HD | GN     | LR | 43 | 1853 | 48.2 | 60.1 |
| I40 | t1, v0, i1, g0 / ci1, ct1, cg0, mm0, cv1, ah0 / ptc0                     | IF/TA grade 1, Borderline TCMR | 30 | F | 19.20 | PD | GN     | LR | 56 | 1951 | 84.6 | 66.9 |
| I41 | t1, v0, i0, g0, ti1, i-IFTA2 / ci2, ct2, cg0, mm0, cv0, ah0, aah0 / ptc0 | IF/TA grade 2, Borderline TCMR | 56 | M | 23.50 | ND | PKD    | LU | 57 | 967  | 64.7 | 67.1 |
| C1  | t0, v0, i0, g0, ti0, i-IFTA0 / ci0, ct0, cg0, mm0, cv0, ah0, aah0 / ptc0 | no evidence of acute rejection | 58 | M | 25.14 | HD | DM     | LR | 20 | 819  | 80.1 | 94.5 |
| C2  | t0, v0, i0, g0 / ci0, ct0, cg0, mm0, cv0, ah0 / ptc0                     | no evidence of acute rejection | 35 | M | 22.05 | HD | GN     | D  | 42 | 1780 | 69.8 | 60.9 |
| C3  | t0, v0, i0, g0 / ci0, ct0, cg0, mm1, cv1, ah0 / ptc0                     | no evidence of acute rejection | 56 | F | 21.05 | HD | others | LU | 57 | 1133 | 77.0 | 74.5 |
| C4  | t0, v0, i0, g0, ti0, i-IFTA0 / ci0, ct0, cg0, mm0, cv1, ah0, aah0 / ptc0 | no evidence of acute rejection | 68 | M | 23.31 | HD | PKD    | LU | 68 | 1070 | 53.2 | 68.1 |
| C5  | t0, v0, i0, g0, ti0, i-IFTA0 / ci0, ct0, cg0, mm0, cv1, ah0, aah0 / ptc0 | no evidence of acute rejection | 43 | M | 25.69 | HD | HTN    | LU | 41 | 839  | 73.1 | 74.4 |
| C6  | t0, v0, i0, g0 / ci0, ct0, cg0, mm0, cv1, ah0 / ptc0                     | no evidence of acute rejection | 61 | M | 20.24 | HD | GN     | D  | 65 | 1103 | 55.4 | 64.0 |
| C7  | t0, v0, i0, g0, ti0, i-IFTA0 / ci0, ct0, cg0, mm0, cv0, ah0, aah0 / ptc0 | no evidence of acute rejection | 21 | F | 17.85 | ND | others | LR | 47 | 955  | 78.9 | 69.7 |
| C8  | t0, v0, i0, g0, ti0, i-IFTA0 / ci0, ct0, cg0, mm0, cv0, ah0, aah0 / ptc0 | no evidence of acute rejection | 31 | F | 30.14 | HD | UK     | LR | 53 | 798  | 50.8 | 42.7 |
| C9  | t0, v0, i0, g0 / ci0, ct0, cg0, mm0, cv0, ah0 / ptc0                     | no evidence of acute rejection | 37 | M | 24.32 | HD | GN     | LR | 40 | 1195 | 72.6 | 71.1 |
| C10 | t0, v0, i0, g0, ti0, i-IFTA0 / ci0, ct0, cg0, mm0, cv1, ah0, aah0 / ptc0 | no evidence of acute rejection | 68 | M | 26.29 | ND | UK     | LU | 63 | 586  | 50.9 | 55.1 |
| C11 | t0, v0, i0, g0, ti0, i-IFTA0 / ci0, ct0, cg0, mm0, cv1, ah0, aah0 / ptc0 | no evidence of acute rejection | 51 | M | 23.92 | HD | UK     | LR | 54 | 839  | 66.6 | 71.5 |
| C12 | t0, v0, i0, g0 / ci0, ct0, cg0, mm0, cv0, ah0 / ptc0                     | no evidence of acute rejection | 58 | M | 27.91 | HD | DM     | D  | 27 | 1057 | 97.4 | 75.1 |
| C13 | t0, v0, i0, g0, ti0, i-IFTA0 / ci0, ct0, cg0, mm0, cv0, ah0, aah0 / ptc0 | no evidence of acute rejection | 63 | F | 20.66 | HD | GN     | LU | 67 | 996  | 80.2 | 75.0 |
| C14 | t0, v0, i0, g0 / ci0, ct0, cg0, mm0, cv1, ah0 / ptc0                     | no evidence of acute rejection | 20 | M | 20.64 | PD | others | LR | 51 | 2008 | 64.4 | 49.0 |
| C15 | t0, v0, i0, g0, ti0, i-IFTA0 / ci0, ct0, cg0, mm0, cv1, ah0, aah0 / ptc0 | no evidence of acute rejection | 64 | M | 19.93 | HD | GN     | LR | 39 | 687  | 70.1 | 69.1 |
| C16 | t0, v0, i0, g0 / ci0, ct0, cg0, mm1, cv1, ah0 / ptc0                     | no evidence of acute rejection | 47 | F | 21.01 | HD | DM     | LR | 65 | 1122 | 77.6 | 77.0 |
| C17 | t0, v0, i0, g0 / ci1, ct0, cg0, mm0, cv1, ah0 / ptc0                     | no evidence of acute rejection | 20 | F | 17.53 | ND | GN     | LR | 49 | 1319 | 61.7 | 61.0 |

|     |                                                                          |                                |    |   |       |    |        |    |    |      |      |      |
|-----|--------------------------------------------------------------------------|--------------------------------|----|---|-------|----|--------|----|----|------|------|------|
| C18 | t0, v0, i0, g0 / ci0, ct0, cg0, mm0, cv0, ah0 / ptc0                     | no evidence of acute rejection | 63 | F | 23.04 | HD | GN     | LR | 46 | 1160 | 60.6 | 65.1 |
| C19 | t0, v0, i0, g0, ti0, i-IFTA0 / ci0, ct0, cg0, mm0, cv0, ah0, aah0 / ptc0 | no evidence of acute rejection | 63 | M | 25.19 | HD | DM     | LR | 37 | 832  | 56.6 | 56.4 |
| C20 | t0, v0, i0, g0, ti0, i-IFTA0 / ci0, ct0, cg0, mm0, cv0, ah0, aah0 / ptc0 | no evidence of acute rejection | 57 | F | 27.52 | HD | UK     | D  | 33 | 508  | 51.0 | 48.5 |
| C21 | t0, v0, i0, g0, ti0, i-IFTA0 / ci0, ct0, cg0, mm0, cv0, ah0, aah0 / ptc0 | no evidence of acute rejection | 33 | M | 24.21 | PD | GN     | LR | 60 | 599  | 54.8 | 49.1 |
| C22 | t0, v0, i1, g0 / ci0, ct0, cg0, mm0, cv0, ah0 / ptc0                     | no evidence of acute rejection | 60 | M | 24.91 | HD | DM     | LU | 58 | 1305 | 64.0 | 57.8 |
| C23 | t0, v0, i0, g0 / ci0, ct0, cg0, mm1, cv0, ah0 / ptc0                     | no evidence of acute rejection | 29 | M | 30.07 | ND | GN     | LR | 48 | 1140 | 53.2 | 61.8 |
| C24 | t0, v0, i0, g0 / ci0, ct0, cg0, mm0, cv0, ah0 / ptc0                     | no evidence of acute rejection | 52 | F | 23.91 | HD | others | LR | 30 | 1133 | 57.3 | 71.4 |
| C25 | t0, v0, i0, g0 / ci0, ct0, cg0, mm0, cv0, ah0 / ptc0                     | no evidence of acute rejection | 45 | F | 20.56 | ND | UK     | LU | 48 | 1534 | 63.9 | 62.5 |
| C26 | t0, v0, i0, g0, ti0, i-IFTA0 / ci0, ct0, cg0, mm0, cv0, ah0, aah0 / ptc0 | no evidence of acute rejection | 52 | F | 24.50 | ND | DM     | LR | 29 | 694  | 68.1 | 66.1 |
| C27 | t0, v0, i0, g0, ti0, i-IFTA0 / ci0, ct0, cg0, mm0, cv0, ah0, aah0 / ptc0 | no evidence of acute rejection | 39 | F | 26.50 | HD | DM     | D  | 24 | 1042 | 80.3 | 81.0 |
| C28 | t0, v0, i0, g0, ti0, i-IFTA0 / ci0, ct0, cg0, mm0, cv1, ah0, aah0 / ptc0 | no evidence of acute rejection | 62 | M | 26.84 | ND | DM     | LR | 27 | 538  | 54.8 | 55.8 |
| C29 | t0, v0, i0, g0 / ci0, ct0, cg0, mm0, cv0, ah0 / ptc0                     | no evidence of acute rejection | 61 | M | 20.47 | HD | PKD    | D  | 58 | 1880 | 54.8 | 56.6 |
| C30 | t0, v0, i0, g0 / ci0, ct0, cg0, mm0, cv0, ah0 / ptc0                     | no evidence of acute rejection | 44 | F | 20.91 | HD | GN     | LR | 35 | 1329 | 75.4 | 80.4 |
| C31 | t0, v0, i0, g0 / ci0, ct0, cg0, mm0, cv0, ah0 / ptc0                     | no evidence of acute rejection | 57 | M | 22.68 | HD | GN     | D  | 23 | 1290 | 70.8 | 75.1 |
| C32 | t0, v0, i1, g0 / ci0, ct0, cg0, mm0, cv0, ah0 / ptc0                     | no evidence of acute rejection | 34 | F | 22.59 | ND | DM     | LR | 58 | 1828 | 62.8 | 62.4 |
| C33 | t0, v0, i0, g0 / ci0, ct0, cg0, mm0, cv0, ah0 / ptc0                     | no evidence of acute rejection | 42 | M | 26.19 | ND | others | LR | 43 | 1553 | 61.2 | 67.0 |
| C34 | t0, v0, i1, g0, ti1, i-IFTA0 / ci0, ct0, cg0, mm0, cv0, ah0, aah0 / ptc0 | no evidence of acute rejection | 57 | F | 18.83 | HD | PKD    | LU | 57 | 528  | 69.6 | 62.5 |
| C35 | t0, v0, i0, g0, ti0, i-IFTA0 / ci0, ct0, cg0, mm0, cv0, ah0, aah0 / ptc0 | no evidence of acute rejection | 55 | F | 20.06 | HD | GN     | LU | 59 | 519  | 74.2 | 81.2 |
| C36 | t0, v0, i0, g0 / ci0, ct0, cg0, mm0, cv0, ah0 / ptc0                     | no evidence of acute rejection | 63 | M | 19.10 | HD | GN     | LU | 60 | 1235 | 46.7 | 51.6 |
| C37 | t0, v0, i0, g0 / ci0, ct0, cg0, mm1, cv0, ah0 / ptc0                     | no evidence of acute rejection | 36 | M | 22.59 | ND | GN     | LU | 34 | 1501 | 82.7 | 77.8 |

|     |                                                                          |                                |    |   |       |    |        |    |    |      |      |      |
|-----|--------------------------------------------------------------------------|--------------------------------|----|---|-------|----|--------|----|----|------|------|------|
| C38 | t0, v0, i1, g0 / ci0, ct0, cg0, mm0, cv0, ah0 / ptc0                     | no evidence of acute rejection | 50 | M | 24.20 | HD | UK     | D  | 53 | 1894 | 52.9 | 55.8 |
| C39 | t0, v0, i0, g0 / ci0, ct0, cg0, mm0, cv0, ah0 / ptc1                     | no evidence of acute rejection | 68 | M | 23.39 | HD | HTN    | LR | 39 | 1500 | 79.5 | 59.5 |
| C40 | t0, v0, i0, g0, ti0, i-IFTA0 / ci0, ct0, cg0, mm0, cv0, ah0, aah0 / ptc0 | no evidence of acute rejection | 55 | M | 27.40 | HD | UK     | LR | 41 | 624  | 47.7 | 57.6 |
| C41 | t0, v0, i0, g0, ti0, i-IFTA0 / ci0, ct0, cg0, mm0, cv0, ah0, aah0 / ptc0 | no evidence of acute rejection | 39 | M | 26.93 | HD | others | LR | 42 | 559  | 70.4 | 60.1 |

I, IF/TA; C, Control; IT/FA, interstitial fibrosis and tubular atrophy; M, male; F, female; BMI, body mass index; ND, no dialysis; HD, hemodialysis; PD, peritoneal dialysis; DM, diabetes; GN, glomerular nephritis; HTN, hypertension; PKD, polycystic kidney disease; UK, unknown; D, deceased; LR, living/related; LU, living/unrelated; POD, postoperative days; eGFR, estimated glomerular filtration rate; NA, not available; TCMR, T cell-mediated rejection; t0, cortical tubules without tubulitis; t1, defined as foci of 1-4 mononuclear cells per tubular cross section or per 10 tubular epithelial cells; t2, defined as 5 to 10 mononuclear cells per tubular cross section or per 10 epithelial cells; t3, defined as foci with >10 mononuclear cells/tubular cross section; v0, no arteritis; v1, mild to moderate intimal arteritis in at least 1 arterial cross section; v2, severe intimal arteritis with at least 25% luminal area lost in at least 1 arterial cross section; v3, transmural arteritis and/or arterial fibrinoid change and medial smooth muscle necrosis with lymphocytic infiltrate in vessel; i0, no inflammation or in less than 10% of unscarred cortical parenchyma; i1, inflammation in 10 to 25% of unscarred cortical parenchyma; i2, inflammation in 26 to 50% of unscarred cortical parenchyma; i3, inflammation in more than 50% of unscarred cortical parenchyma; g0, no glomerulitis; g1, segmental or global glomerulitis in less than 25% of glomeruli; g2, segmental or global glomerulitis in 25 to 75% of glomeruli; g3, segmental or global glomerulitis in more than 75% of glomeruli; ti0, no or trivial interstitial inflammation (<10% of total cortical parenchyma); ti1, 10-25% of total cortical parenchyma inflamed; ti2, 26-50% of total cortical parenchyma inflamed; ti3, >50% of total cortical parenchyma inflamed; ptc0, maximum number of leukocytes <3; ptc1, at least 1 leukocyte cell in ≥10% of cortical PTCs with 3-4 leukocytes in most severely involved PTC; ptc2, at least 1 leukocyte in ≥10% of cortical PTC with 5-10 leukocytes in most severely involved PTC; ptc3, at least 1 leukocyte in ≥10% of cortical PTC with >10 leukocytes in most severely involved PTC; ci0, interstitial fibrosis in up to 5% of cortical area; ci1, interstitial fibrosis in 6 to 25% of cortical area (mild interstitial fibrosis); ci2, interstitial fibrosis in 26 to 50% of cortical area (moderate interstitial fibrosis); ci3, interstitial fibrosis in >50% of cortical area (severe interstitial fibrosis); ct0, no tubular atrophy; ct1, tubular atrophy involving up to 25% of the area of cortical tubules; ct2, tubular atrophy involving 26 to 50% of the area of cortical tubules; ct3, tubular atrophy involving in >50% of the area of cortical tubules; cv0, no chronic vascular changes; cv1, vascular narrowing of up to 25% luminal area by fibrointimal thickening; cv2, vascular narrowing of 26 to 50% luminal area by fibrointimal thickening; cv3, vascular narrowing of more than 50% luminal area by fibrointimal thickening; cg0, no glomerular basement membrane (GBM) double contours by light microscopy (LM) or electron microscopy (EM); cg1a, no GBM double contours by LM but GBM double contours (incomplete or circumferential) in at least 3 glomerular capillaries by EM, with associated endothelial swelling and/or subendothelial electron-lucent widening; cg1b, double contours of the GBM in 1-25% of capillary loops in the most affected nonsclerotic glomerulus by LM; EM confirmation is recommended if EM is available; cg2, double contours affecting 26 to 50% of peripheral capillary loops in the most affected, glomerulus; cg3, double contours affecting more than 50% of peripheral capillary loops in the most affected-glomerulus; mm0, no more than mild mesangial matrix increase in any glomerulus; mm1, at least moderate mesangial matrix increase in up to 25% of nonsclerotic glomeruli; mm2, at least moderate mesangial matrix increase in 26% to 50% of nonsclerotic glomeruli; mm3, at least moderate mesangial matrix increase in >50% of nonsclerotic glomeruli; ah0, no periodic acid-Schiff (PAS)-positive hyaline arteriolar thickening; ah1, mild to moderate PAS-positive hyaline thickening in at least 1 arteriole; ah2, moderate to severe PAS-positive hyaline thickening in more than 1 arteriole; ah3, Severe PAS-positive hyaline thickening in many arterioles; aah0, no typical lesions of calcineurin inhibitor-related arteriolopathy; aah1, replacement of degenerated smooth muscle cells by hyaline deposits in only 1 arteriole, without circumferential involvement; aah2, replacement of degenerated smooth muscle cells by hyaline deposits in more than 1 arteriole, without circumferential involvement; aah3, replacement of degenerated smooth muscle cells by hyaline deposits with circumferential involvement, independent of the number of arterioles involved; i-IFTA0, no inflammation or less than 10% of scarred cortical

---

parenchyma; i-IFTA1, inflammation in 10% to 25% of scarred cortical parenchyma; i-IFTA2, inflammation in 26% to 50% of scarred cortical parenchyma; i-IFTA3, inflammation in >50% of scarred cortical parenchyma<sup>1</sup>

---

<sup>1</sup> Roufosse C, Simmonds N, Clahsen-van Groningen M, Haas M, Henriksen KJ, Horsfield C, et al. A 2018 Reference Guide to the Banff Classification of Renal Allograft Pathology. Transplantation 2018; 102: 1795–1814

**Table S3.** qPCR validation of mRNA-sequencing data for IF/TA patients and controls at one-year protocol biopsy after kidney transplantation.

| Gene ID        | mRNA sequencing          |          | qPCR                     |          |
|----------------|--------------------------|----------|--------------------------|----------|
|                | Fold change <sup>a</sup> | <i>q</i> | Fold change <sup>a</sup> | <i>p</i> |
| <i>ADAMTS2</i> | 3.52                     | 0.006    | 2.20                     | <0.001   |
| <i>CHI3L1</i>  | 2.12                     | 0.006    | 1.53                     | 0.012    |
| <i>CXCR2</i>   | 2.96                     | 0.006    | 1.39                     | 0.002    |
| <i>IL1R2</i>   | 2.68                     | 0.006    | 1.75                     | <0.001   |
| <i>LRG1</i>    | 2.19                     | 0.006    | 1.55                     | <0.001   |
| <i>MMP9</i>    | 3.48                     | 0.006    | 1.72                     | 0.001    |

<sup>a</sup> Fold change in the mean value (IF/TA vs. control).



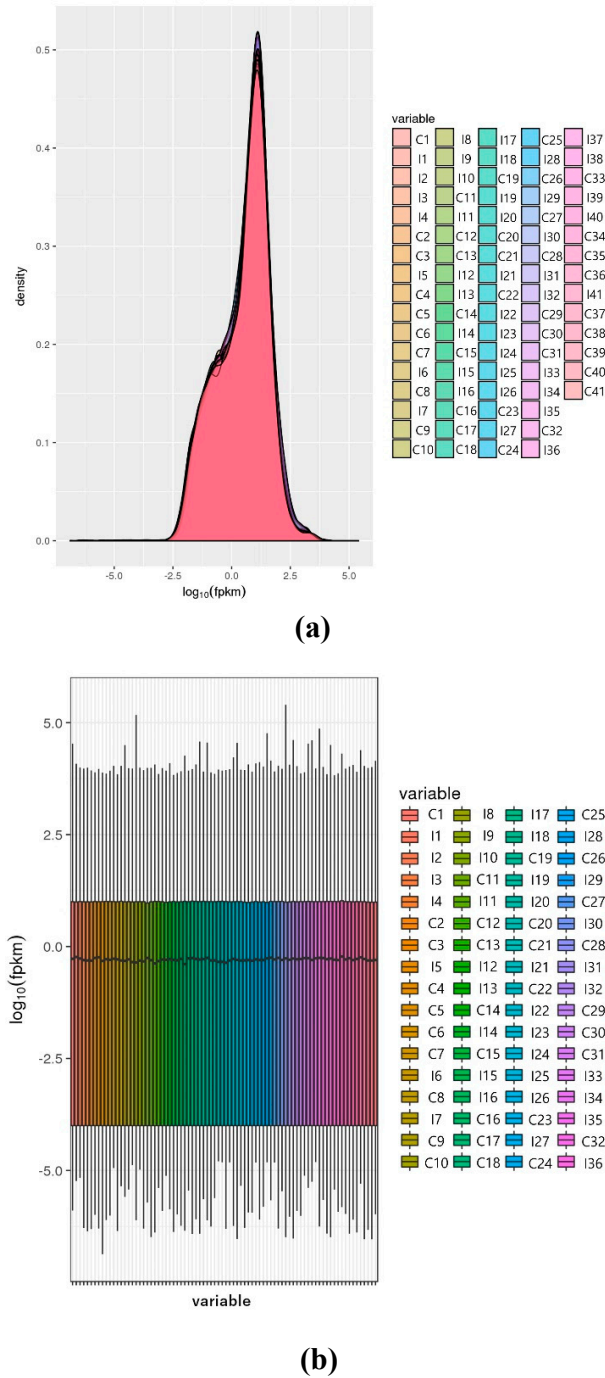

**Figure S1. (a)** A density plot of FPKM distribution of all samples. A color code represents distinct samples. Each line in the density plot corresponds to distinct samples. FPKM, fragments of transcript per kilobase per million reads; I, IF/TA; C, Control **(b)** A box plot of FPKM distribution of all samples. The line in the box plot represents the median value, the box represents the interquartile range, and the whisker represents the highest and lowest values.

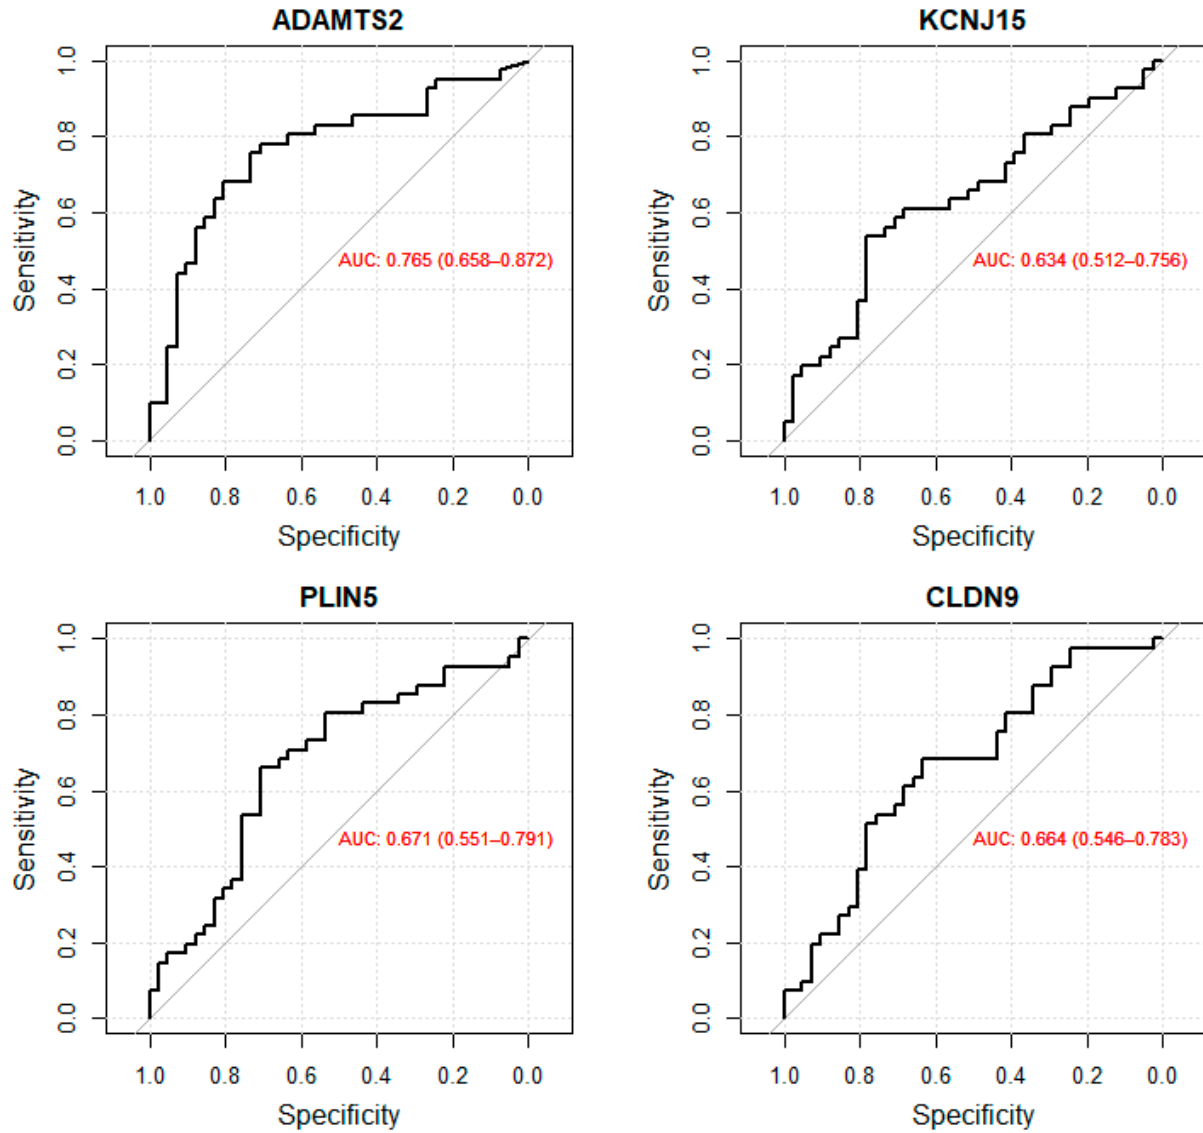

**Figure S2.** ROC curves evaluating the sensitivity and specificity of the DEG's which showed a  $\log_2(\text{fold change})$  of  $> 1.5$  and AUC values of  $> 0.6$  as a biomarker of IF/TA. AUC, area under the receiver operating characteristic curve

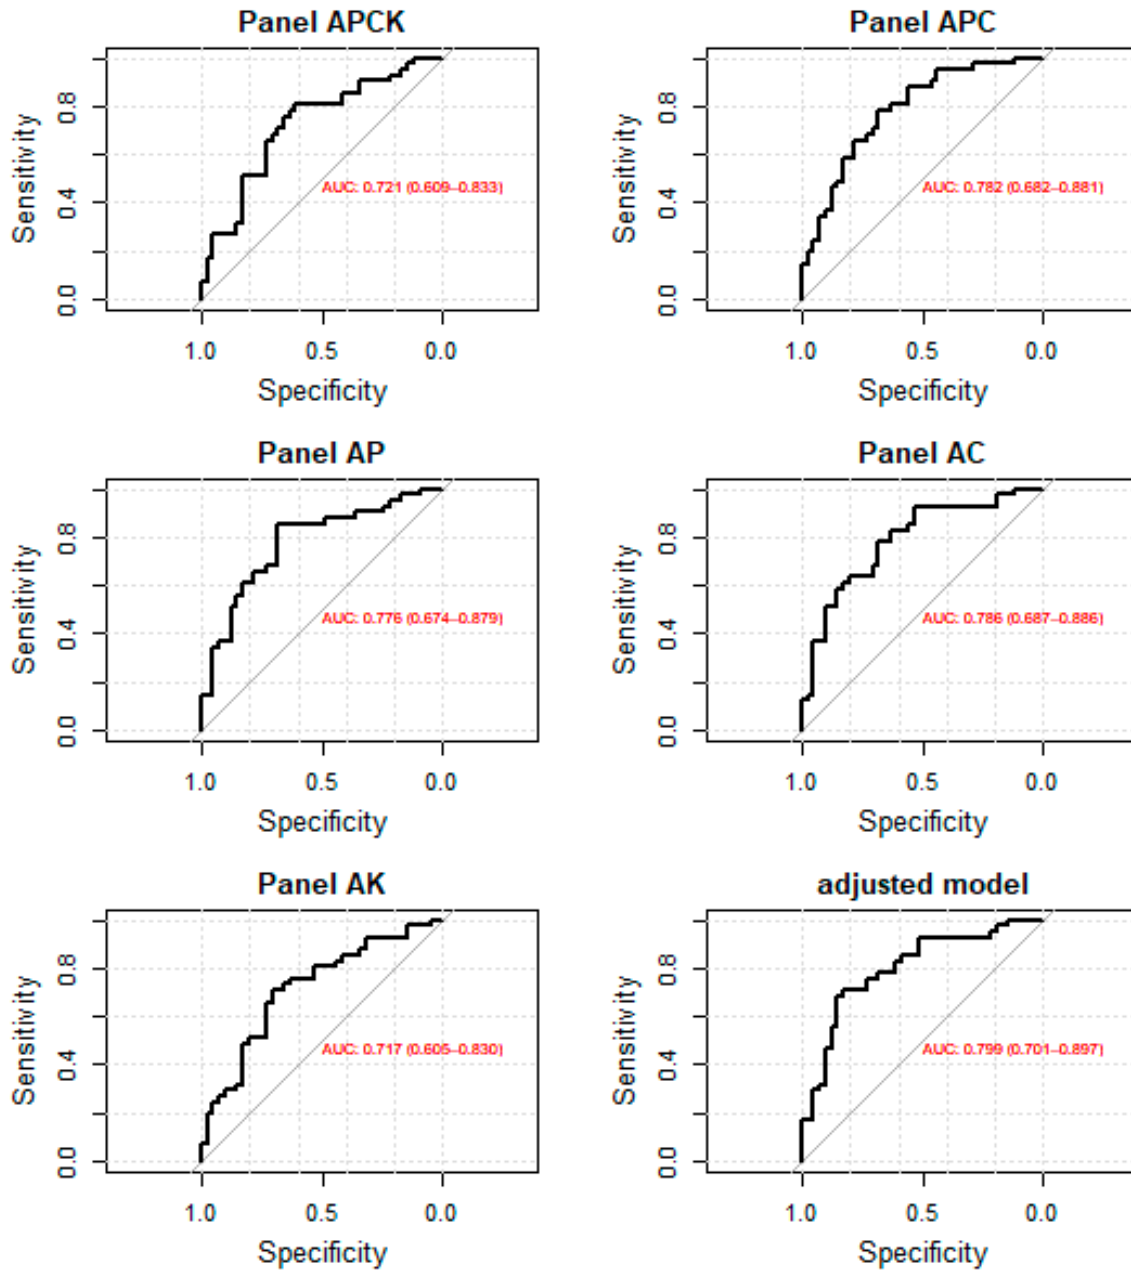

**Figure S3.** ROC curves evaluating the sensitivity and specificity of DEG panels with  $\log_2$  (fold change)  $>1.5$  and AUC values  $>0.6$  as biomarkers for IF/TA. The adjusted model represents a model according to *ADAMTS2* expression adjusted for recipient age. AUC, area under the receiver operating characteristic curve; A, *ADAMTS2*; P, *PLIN5*; C, *CLDN9*; K, *KCNJ15*
